# Supplementary material for: Allograft inflammatory factor 1 is a potential diagnostic, immunological, and prognostic biomarker in pan-cancer
Source: publisher site journal article supplement (doi:10.18632/aging.204631), 2023-04-03
Supplement: Supplementary file [file aging-v15i7-204631-supplementary-material-SD1.pdf]

SUPPLEMENTARY FIGURES

Correlation analysis between AIF-1 expression and the number of tumors neoantigens

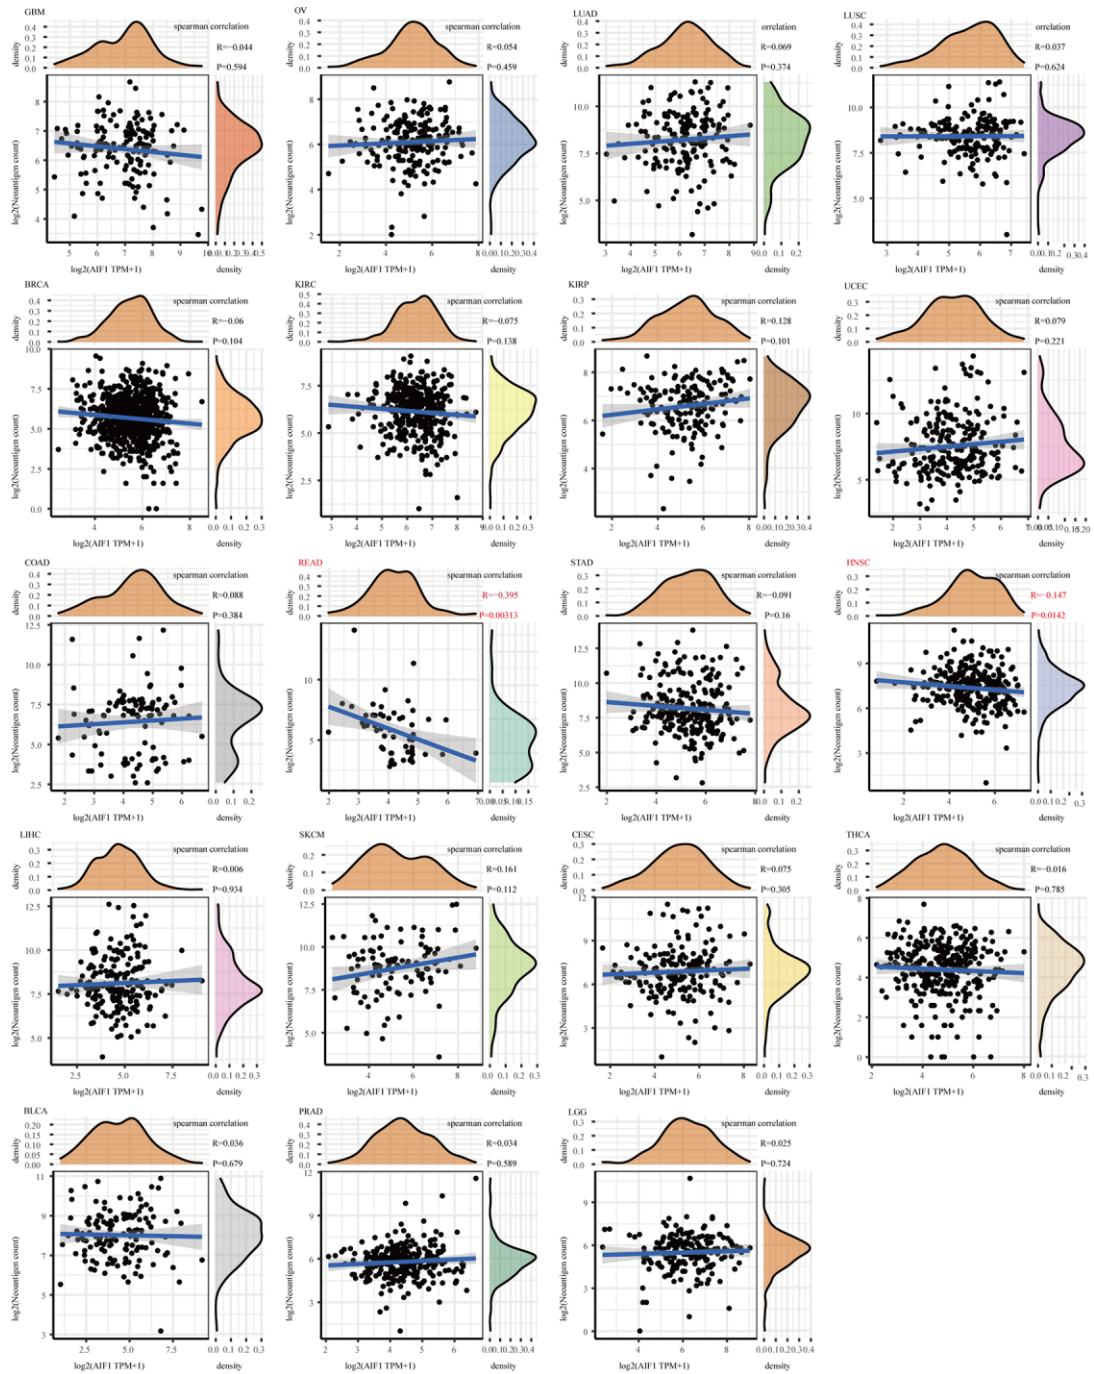

Supplementary Figure 1. Correlation analysis between AIF-1 expression across cancers and the number of tumors neoantigens.



### Relationship between AIF-1 expression and the ImmuneScores

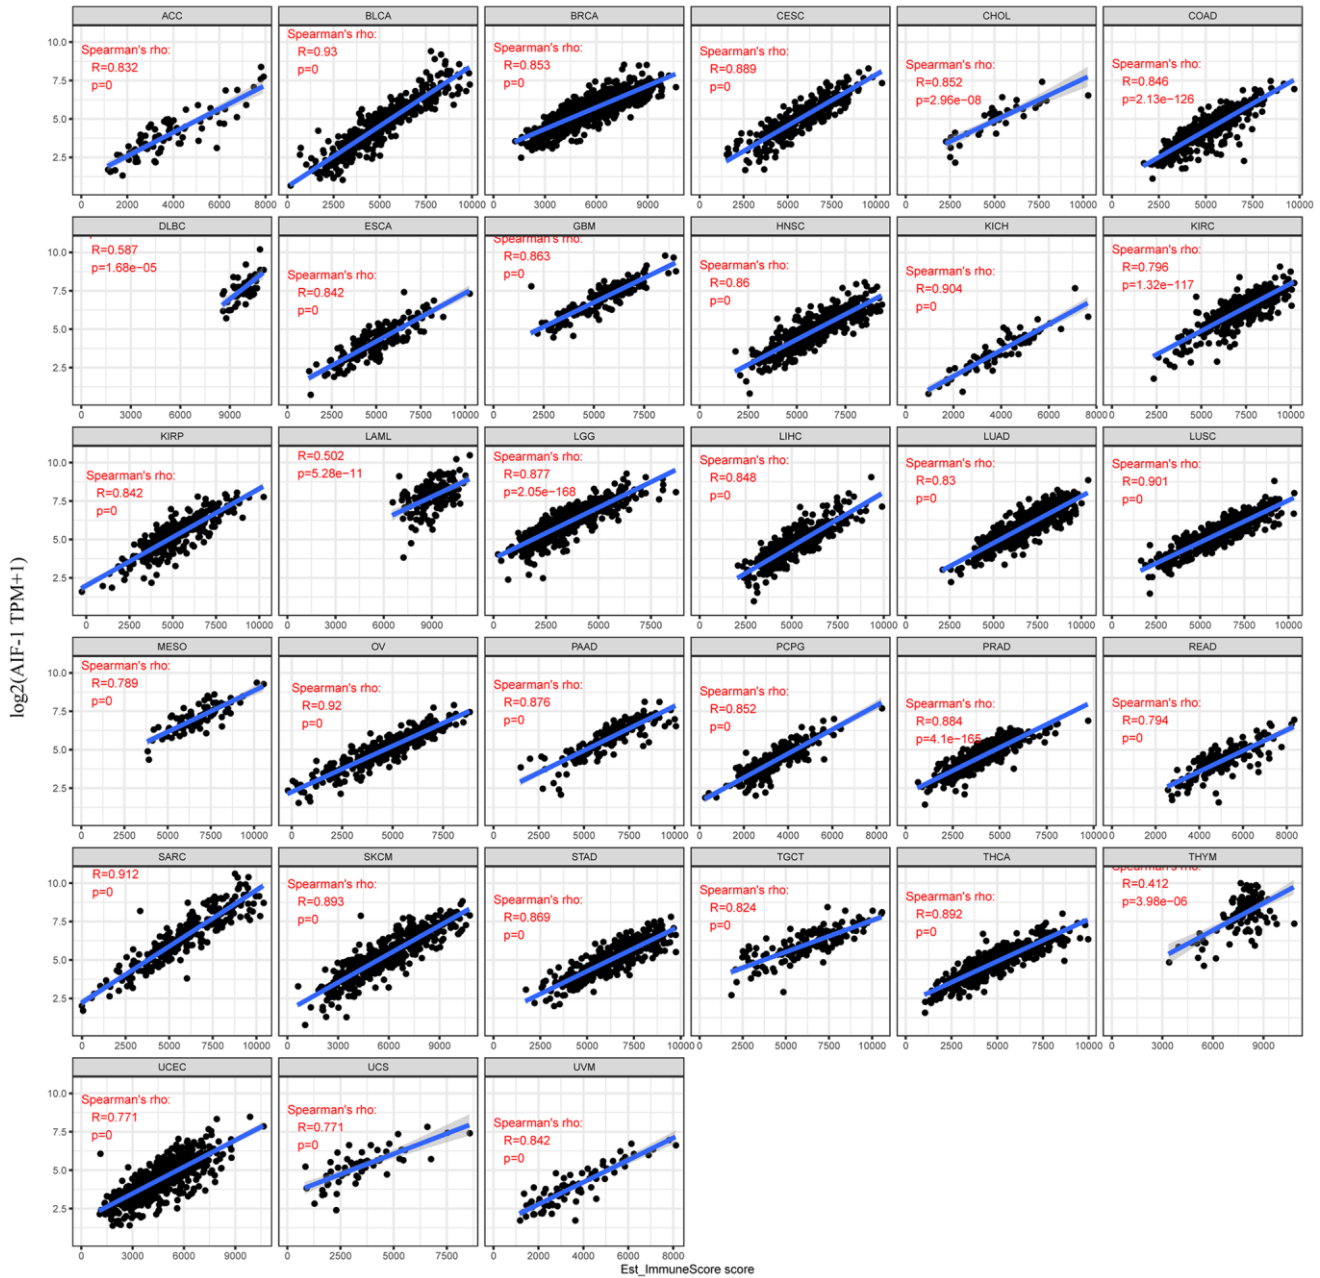

Supplementary Figure 3. Correlation analysis between the expression levels of AIF-1 and the ImmuneScore across cancers.

## Relationship between AIF-1 expression and the ESTIMATEScore

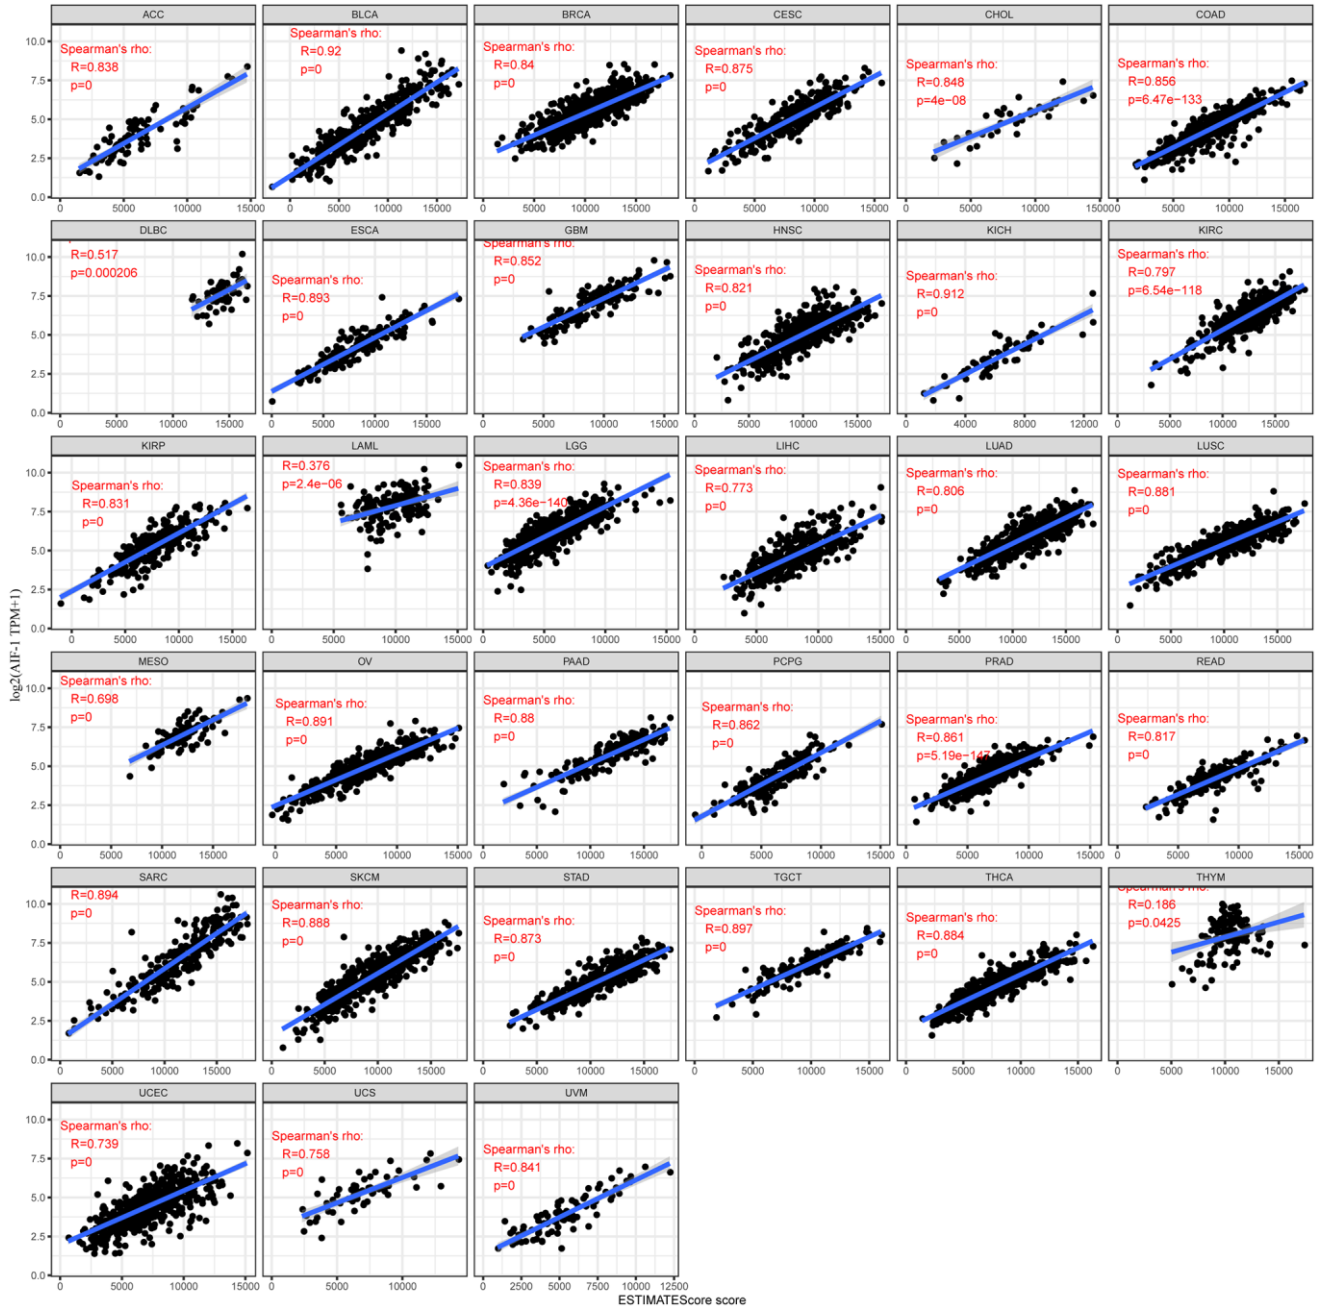

Supplementary Figure 4. Correlation analysis between the expression levels of AIF-1 and EstimateScore across cancers.



### A Univariate Cox regression of AIF-1 in SKCM (OS)

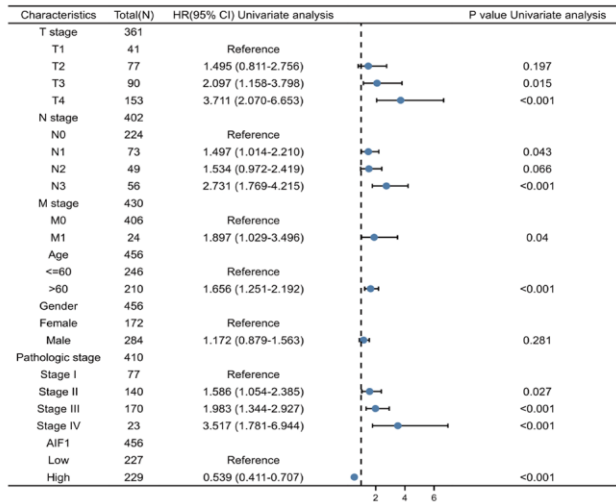

### B Multivariate Cox regression of AIF-1 in SKCM (OS)

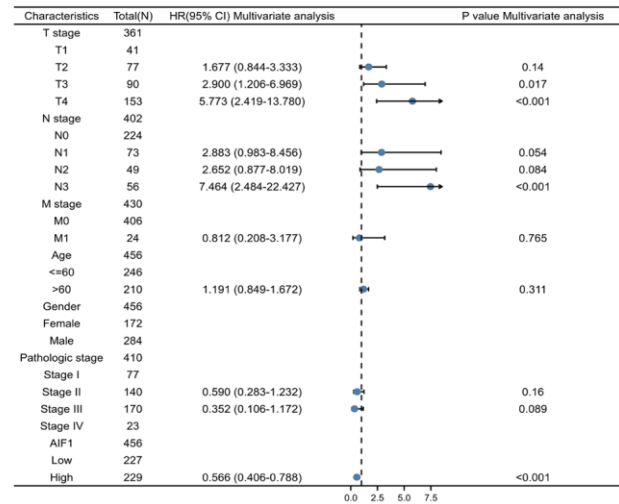

### C Univariate Cox regression of AIF-1 in UVM (OS)

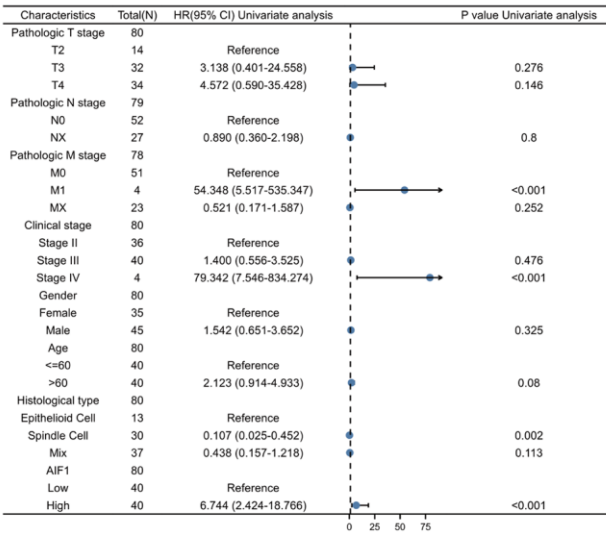

### D Multivariate Cox regression of AIF-1 in UVM (OS)

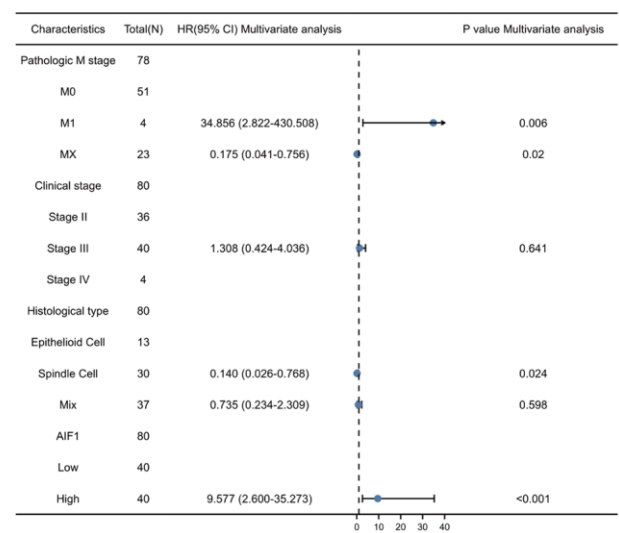

**Supplementary Figure 5. Prognostic value of AIF-1 expression.** (A) Univariate Cox regression of AIF-1 in SKCM (OS). (B) Multivariate Cox regression of AIF-1 in SKCM (OS). (C) Univariate Cox regression of AIF-1 in UVM (OS). (D) Multivariate Cox regression of AIF-1 in UVM (OS).
